# Supplementary material
Source: HighWire-hosted journal article supplement (doi:10.1101/rna.079396.122)
Supplement: Supplemental_Figure_Legends.docx [file Supplemental_Figure_Legends.docx]

**Supplementary figure legends**

**Supplementary Figure 1 Sequencing analysis of PolRP1 RNA products.**

**A.** Schematic showing preparation of cDNA for sequencing.

**B.** Bar plot showing number of variations versus number of reads.

**C.** Table showing % of reads with the indicated number of variations from the reference sequence.

**Supplementary Figure 2 Controls for PolRP1 ribonucleotide misicorporation.**

**A-C.** Denaturing gels showing PolRP1 extension of the indicated RNA/DNA in the presence of the indicated ribonucleotides.

**Supplementary Figure 3 Controls for the effects of ribonucleotide analogs on PolRP1 ribonucleotide misicorporation.**

**A,B.** Denaturing gels showing PolRP1 extension of the indicated RNA/DNA in the presence of the indicated canonical and modified ribonucleotides at the concentrations shown. % misincorporation is indicated.
